# Supplementary material for: Neurofunctional Domains Derived From Deep Behavioral Phenotyping in Alcohol Use Disorder
Source: Atypon-hosted journal article supplement (doi:10.1176/appi.ajp.2018.18030357), 2019-01-04
Supplement: appi.ajp.2018.18030357.correction01.pdf [file appi.ajp.2018.18030357.correction01.pdf]

## **Correction to Kwako et al.**

When the article “Neurofunctional Domains Derived From Deep Behavioral Phenotyping in Alcohol Use Disorder,” by Laura E. Kwako et al. (doi: 10.1176/appi.ajp.2018.18030357) was published online on January 4, 2019, the coding for male and female was reversed. Footnote c in Table 3 should have read “0=female, 1=male,” and the second sentence in the section on the MIMIC analysis in the Results section should have read “Predictors of higher scores for negative emotionality included alcohol use disorder, being male, emotional abuse, sexual abuse, and the emotional neglect subscales of the Childhood Trauma Questionnaire.” These corrections were made and the article was reposted on April 12, 2019.
