# Supplementary material for: Neurofunctional Domains Derived From Deep Behavioral Phenotyping in Alcohol Use Disorder
Source: Atypon-hosted journal article supplement (doi:10.1176/appi.ajp.2018.18030357), 2019-01-04
Supplement: appi.ajp.2018.18030357.ds001.pdf [file appi.ajp.2018.18030357.ds001.pdf]

Data Supplement for Kwako et al., Neurofunctional Domains Derived From Deep Behavioral Phenotyping in Alcohol Use Disorder. Am J Psychiatry (doi: 10.1176/appi.ajp.2018.18030357)

**TABLE S1. Correlation Matrix for Continuous Indicator Measures**

| Measure                        | AI     | MI     | NPI    | K      | AGG   | N      | E     | O      | A      | C      | NU    | PRE   | PERS  | PU    | DEP   | ANX |
|--------------------------------|--------|--------|--------|--------|-------|--------|-------|--------|--------|--------|-------|-------|-------|-------|-------|-----|
| Attentional Impulsivity (AI)   | --     | --     | --     | --     | --    | --     | --    | --     | --     | --     | --    | --    | --    | --    | --    | --  |
| Motor Impulsivity (MI)         | 0.65*  | --     | --     | --     | --    | --     | --    | --     | --     | --     | --    | --    | --    | --    | --    | --  |
| Non-Planning Impulsivity (NPI) | 0.71*  | 0.64*  | --     | --     | --    | --     | --    | --     | --     | --     | --    | --    | --    | --    | --    | --  |
| Delay Discounting (K)          | 0.57*  | 0.43*  | 0.52*  | --     | --    | --     | --    | --     | --     | --     | --    | --    | --    | --    | --    | --  |
| Aggression (AGGR)              | 0.04   | 0.06   | 0.13*  | 0.04   | --    | --     | --    | --     | --     | --     | --    | --    | --    | --    | --    | --  |
| Neuroticism (N)                | 0.55*  | 0.39*  | 0.50*  | 0.60*  | 0.06  | --     | --    | --     | --     | --     | --    | --    | --    | --    | --    | --  |
| Extraversion (E)               | 0.08   | 0.21*  | 0.06   | -0.12* | -0.03 | -0.08  | --    | --     | --     | --     | --    | --    | --    | --    | --    | --  |
| Openness (O)                   | -0.08  | -0.05  | -0.27* | -0.14* | -0.11 | -0.07  | 0.09  | --     | --     | --     | --    | --    | --    | --    | --    | --  |
| Agreeableness (A)              | -0.23* | -0.20* | -0.18* | -0.52* | -0.08 | -0.17* | 0.17* | 0.12*  | --     | --     | --    | --    | --    | --    | --    | --  |
| Conscientiousness (C)          | -0.52* | -0.47* | -0.62* | -0.24* | -0.08 | -0.30* | -0.03 | 0.06   | 0.12*  | --     | --    | --    | --    | --    | --    | --  |
| Negative Urgency (NU)          | 0.74*  | 0.61*  | 0.70*  | 0.63*  | 0.09  | 0.64*  | 0.12* | -0.12* | -0.30* | -0.50* | --    | --    | --    | --    | --    | --  |
| Premeditation (PRE)            | 0.58*  | 0.54*  | 0.63*  | 0.34*  | 0.05  | 0.36*  | 0.16* | 0.08   | -0.21* | -0.62* | 0.57* | --    | --    | --    | --    | --  |
| Perseverance (PERS)            | 0.61*  | 0.43*  | 0.66*  | 0.39*  | 0.10  | 0.46*  | -0.08 | -0.08  | -0.18* | -0.71* | 0.58* | 0.66* | --    | --    | --    | --  |
| Positive Urgency (PU)          | 0.69*  | 0.58*  | 0.62*  | 0.59*  | 0.10  | 0.52*  | 0.09  | -0.18* | -0.34* | -0.47* | 0.83* | 0.54* | 0.55* | --    | --    | --  |
| MADRS Depression (DEP)         | 0.51*  | 0.38*  | 0.51*  | 0.42*  | 0.06  | 0.47*  | 0.03  | -0.09  | -0.13* | -0.34* | 0.55* | 0.33* | 0.39* | 0.49* | --    | --  |
| Trait Anxiety (ANX)            | 0.67*  | 0.47*  | 0.67*  | 0.57*  | 0.06  | 0.71*  | -0.08 | -0.07  | -0.21* | -0.46* | 0.70* | 0.46* | 0.59* | 0.59* | 0.73* | --  |

Note: Pearson correlation coefficients. \* p<0.05

**TABLE S2. Four factor solution from exploratory factor analysis**

| <b>Proposed Grouping</b> | <b>Indicator</b>                      | <b>Factor 1</b> | <b>Factor 2</b> | <b>Factor 3</b> | <b>Factor 4</b> |
|--------------------------|---------------------------------------|-----------------|-----------------|-----------------|-----------------|
| Executive function       | ADHD <sup>1</sup>                     | 0.181           | <b>0.432</b>    | 0.19            | 0.05            |
| Executive function       | Attentional Impulsivity <sup>2</sup>  | 0.321           | <b>0.518</b>    | 0.004           | 0.199           |
| Executive function       | Motor Impulsivity <sup>2</sup>        | 0.128           | <b>0.462</b>    | -0.019          | 0.323           |
| Executive function       | Non-planning Impulsivity <sup>2</sup> | 0.067           | <b>0.749</b>    | 0.102           | -0.01           |
| Executive function       | Delay Discounting (K)                 | 0.114           | -0.027          | 0.012           | -0.211          |
| Executive function       | Conscientiousness <sup>3</sup>        | 0.149           | <b>-0.898</b>   | -0.033          | 0.153           |
| Executive function       | Negative Urgency <sup>4</sup>         | <b>0.445</b>    | 0.344           | 0.134           | 0.288           |
| Executive function       | Premeditation <sup>4</sup>            | -0.004          | <b>0.843</b>    | -0.225          | 0.214           |
| Executive function       | Perseverance <sup>4</sup>             | 0.045           | <b>0.851</b>    | 0.004           | -0.217          |
| Executive function       | Positive Urgency <sup>4</sup>         | <b>0.462</b>    | <b>0.338</b>    | 0.046           | 0.23            |
| Negative Emotionality    | Depression <sup>5</sup>               | 0.206           | -0.011          | <b>0.608</b>    | -0.002          |
| Negative Emotionality    | Neuroticism <sup>3</sup>              | <b>0.599</b>    | -0.008          | 0.25            | 0.038           |
| Negative Emotionality    | Extraversion <sup>3</sup>             | <b>-0.363</b>   | 0.016           | 0.021           | <b>0.618</b>    |
| Negative Emotionality    | Openness <sup>3</sup>                 | 0.025           | -0.154          | -0.115          | 0.229           |
| Negative Emotionality    | Agreeableness <sup>3</sup>            | <b>-0.554</b>   | -0.092          | 0.155           | 0.119           |
| Negative Emotionality    | Trait Anxiety <sup>6</sup>            | <b>0.394</b>    | 0.166           | <b>0.469</b>    | -0.02           |
| Negative Emotionality    | Aggression <sup>7</sup>               | <b>0.9</b>      | -0.008          | -0.005          | -0.075          |
| Negative Emotionality    | OCDS Item 11 <sup>8</sup>             | 0.09            | 0.007           | <b>0.87</b>     | 0.05            |
| Incentive Salience       | OCDS Item 1 <sup>8</sup>              | -0.077          | 0.161           | <b>0.816</b>    | -0.049          |
| Incentive Salience       | OCDS Item 13 <sup>8</sup>             | 0.074           | -0.082          | <b>0.88</b>     | 0.007           |
| Incentive Salience       | ADS Item 18 <sup>9</sup>              | -0.039          | 0.093           | <b>0.883</b>    | 0.048           |

Note: Boldface indicates factor loadings  $\geq 0.350$ . Fit indices are as follows: RMSEA = 0.035, CFI = 0.984, TLI = 0.975

FIGURE S1. Three-dimensional plot of the factor scores for Negative Emotionality, Executive Function, and Incentive Salience, indicating the distribution of scores in participants with and without alcohol use disorder (AUD).

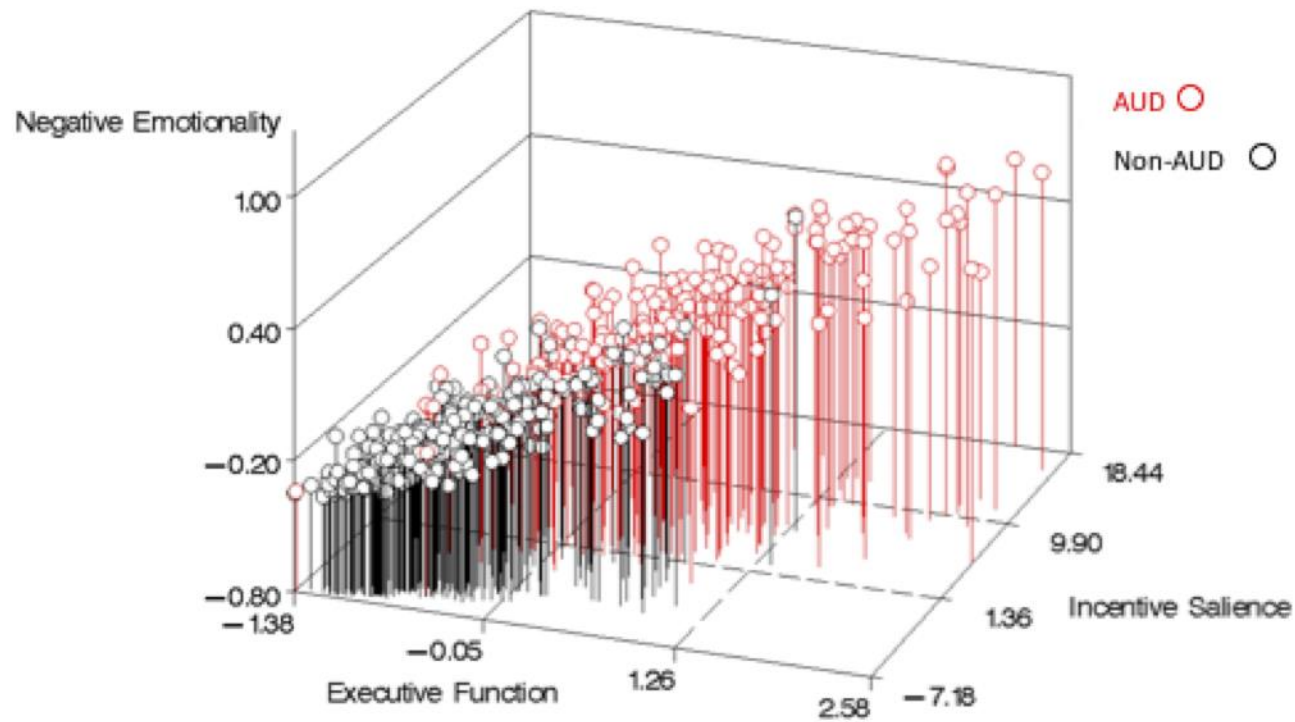

FIGURE S2. ROC curves for each of the three latent domains predicting a diagnosis of AUD.

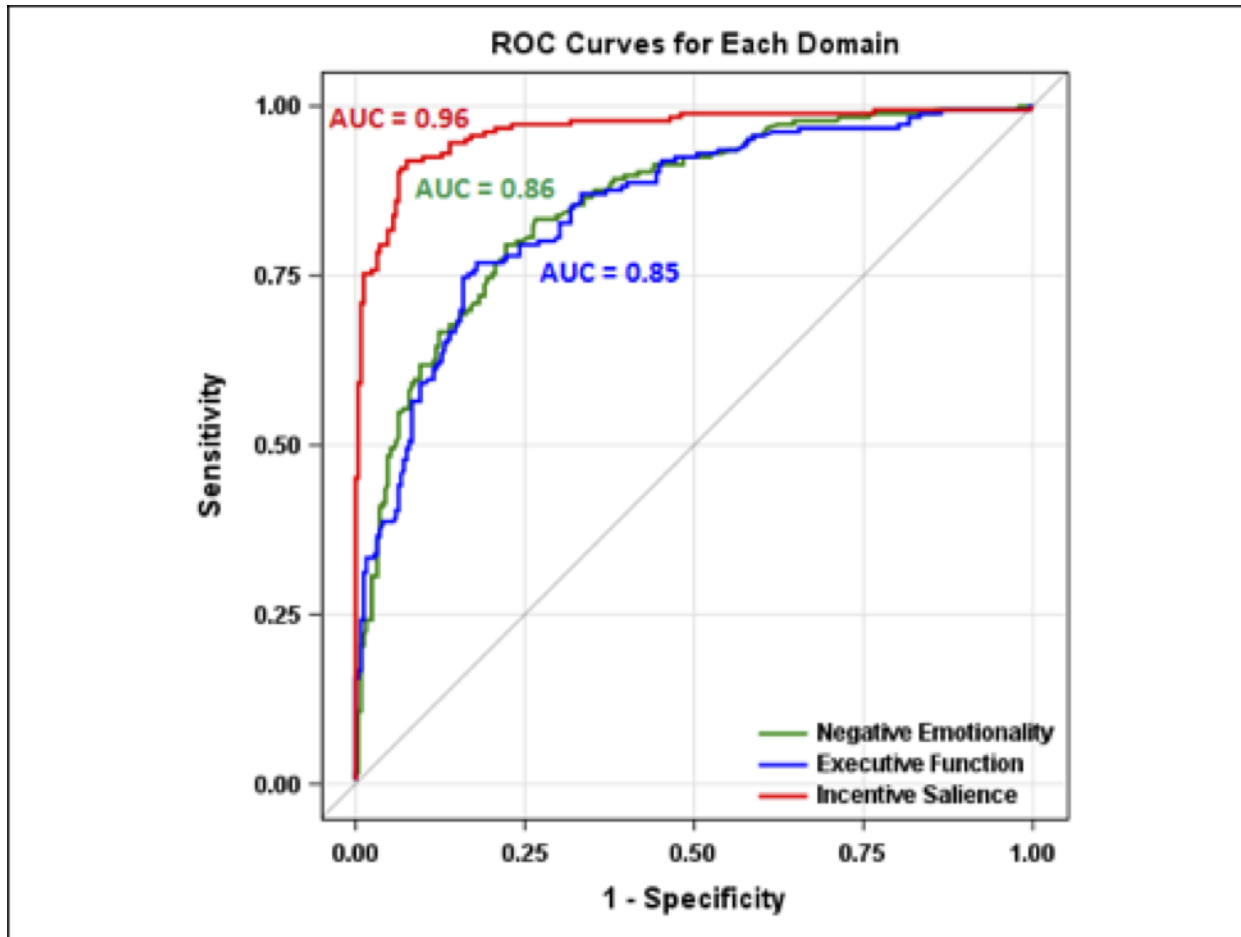

ROC = receiver operating characteristic; AUC = area under the curve.
